# Supplementary material
Source: PubMed Central journal article supplement (PMC3435203)
Supplement: 1206803109_pnas.201206803SI.pdf [file 1206803109_pnas.201206803SI.pdf]

# Supporting Information

van Herwijnen et al. 10.1073/pnas.1206803109

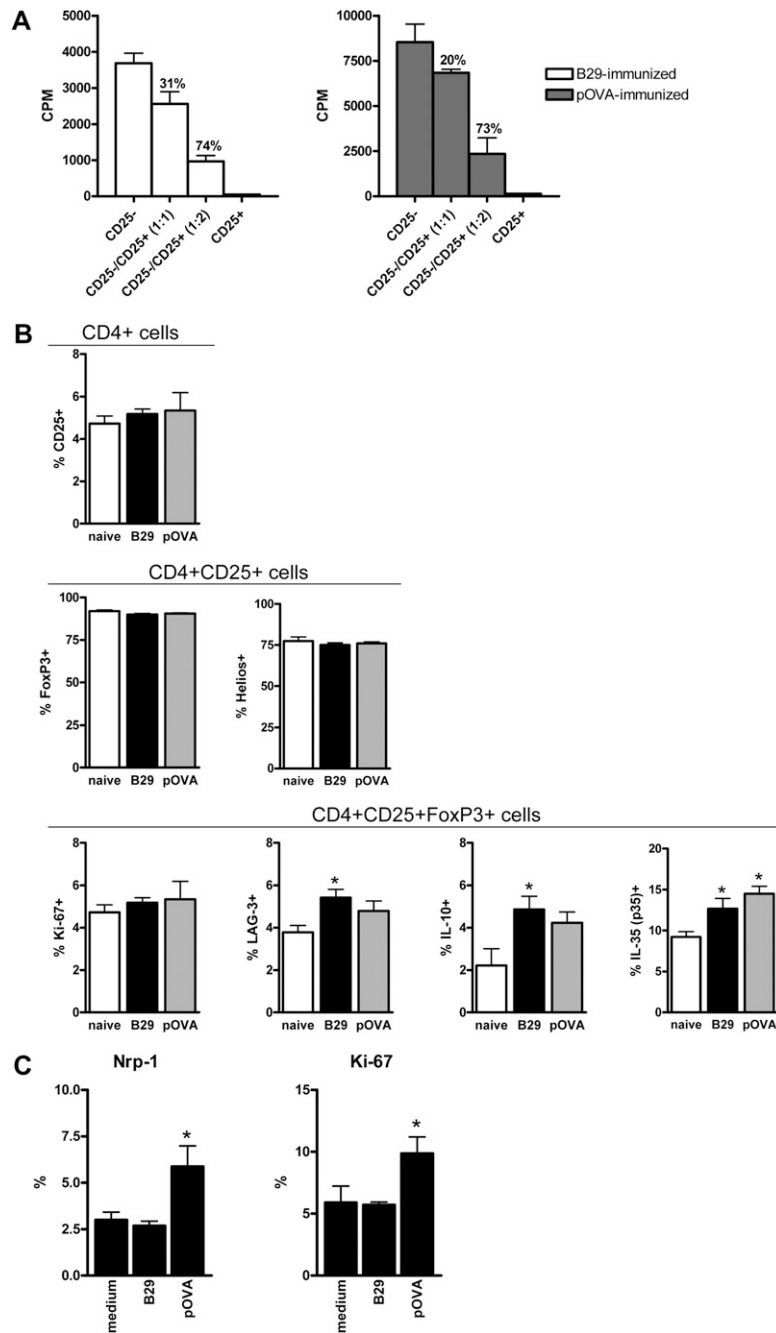

**Fig. S1.** In vitro and phenotypic characterization CD4<sup>+</sup>CD25<sup>+</sup> T cells from B29- or pOVA-immunized mice. (A) CD4<sup>+</sup>CD25<sup>+</sup> and CD4<sup>+</sup>CD25<sup>-</sup> cells from B29- or pOVA-immunized mice were cocultured and stimulated by soluble anti-CD3 antibody. Data are mean of triplicate samples, and results are representative of two independent experiments. Percentages represent suppression of proliferation compared to CD4<sup>+</sup>CD25<sup>-</sup> cells alone. (B) Mice were immunized with B29 or pOVA and CD4<sup>+</sup>CD25<sup>+</sup> (FoxP3<sup>+</sup>) Tregs were analyzed by flow cytometry. Expression ( $\pm$ SEM) of markers related to Treg function were analyzed and showed enhanced expression of LAG-3, IL-10, and p35 (IL-35 subunit) in CD4<sup>+</sup>CD25<sup>+</sup>FoxP3<sup>+</sup> cells. *P* values are from an unpaired two-tailed Student *t* test in which Tregs from B29- or pOVA-immunized mice were compared with Tregs from naive mice. \**P* < 0.05; \*\*\**P* < 0.001. Data are mean of 5–10 animals per group, and data shown are representative of two independent experiments. (C) Splenocytes from pOVA-immunized mice were restimulated for 24 h in the presence of B29 or pOVA and stained for Ki-67 (Right) and Nrp-1 (Left). Percentage of positive cells ( $\pm$ SEM) is shown within the CD4<sup>+</sup>CD25<sup>+</sup>FoxP3<sup>+</sup> population. *P* values are from an unpaired two-tailed Student *t* test in which pOVA was compared with B29. \**P* < 0.05. Data are mean of 5–10 animals per group and are representative of two independent experiments.

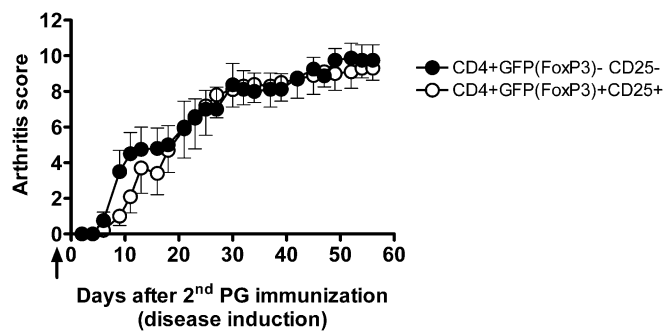

**Fig. S2.** CD4+CD25+FoxP3+ T cells from pOVA-immunized donors are not suppressive in vivo. Mean arthritis scores ( $\pm$ SEM) of recipients with PGIA after adoptive transfer. One day before the second PG immunization, animals received  $3 \times 10^5$  CD4<sup>+</sup> cells i.v. from pOVA-immunized FoxP3–GFP reporter donor mice (arrow). Donor CD4<sup>+</sup> cells were selected on expression of CD25 and/or GFP (FoxP3). [CD4<sup>+</sup>GFP(FoxP3)<sup>–</sup>CD25<sup>–</sup>,  $n = 5$ ; CD4<sup>+</sup>GFP(FoxP3)<sup>+</sup>CD25<sup>+</sup>,  $n = 4$ ].

**Table S1. Identification of *Mt*-Hsp70 epitopes**

| Pool | Peptide name | Sequence        | Position |
|------|--------------|-----------------|----------|
| I    | B18          | YTAPEISARILMKLK | 86–100   |
|      | B59          | KPFQSVIADTGISVS | 291–305  |
|      | B107         | AEGGSKVPEDTLNKV | 530–544  |
|      | B108         | AQAASQATGAHPGG  | 585–599  |
| II   | B7           | EGSRTPSIVAFARN  | 31–45    |
|      | B47          | MQRLREAAEKAKIEL | 231–245  |
|      | B67          | GGKEPNKGVNPDEVV | 331–345  |
|      | B69          | DEVVAVGAALQAGVL | 342–356  |
|      | B74          | LDVTPLSLGIETKGG | 366–380  |
| III  | B29          | VLRIVNEPTAAALAY | 141–155  |
|      | B34          | ILVFDLGGGTFDVSL | 166–180  |
|      | B89          | RGIPQIEVTFDIDAN | 441–455  |
|      | B90          | QIEVTFDIDANGIVH | 445–459  |

To identify the dominant T-cell epitopes of Mt Hsp70, mice were immunized on days 0 and 14 with Mt Hsp70 in DDA. On day 28, spleen cells were isolated and restimulated with a panel of 123 overlapping 15-mer peptides covering the complete sequence of Mt Hsp70. Subsequently induced T-cell responses were detected by <sup>3</sup>H-thymidine incorporation. In multiple experiments the 13 peptides depicted repeatedly induced proliferation upon in vitro restimulation with the peptides and were therefore selected as dominant epitopes. The peptides were divided into three pools according to the degree of sequence identity with mouse Hsp70-peptides: nonidentical (pool I), moderately identical (pool II), or highly identical (pool III).

**Table S2. Origin and sequence of highly conserved B29 peptides**

| Peptide            | Protein      | Origin                            | ID     | Sequence                          |
|--------------------|--------------|-----------------------------------|--------|-----------------------------------|
| B29                | DnaK (Hsp70) | <i>Mycobacterium tuberculosis</i> | 885946 | VLRIVNEPTAAALAY                   |
| mB29a <sup>†</sup> | HspA9        | <i>Mus musculus</i>               | 15526  | VLR <b>V</b> INEPTAAALAY          |
|                    | (GRP75)      | <i>Homo sapiens</i>               | 3313   | VLR <b>V</b> INEPTAAALAY          |
| mB29b <sup>†</sup> | HspA1A       | <i>Mus musculus</i>               | 193740 | VLR <b>I</b> INEPTAA <b>A</b> IAY |
|                    | (Hsp72)      | <i>Homo sapiens</i>               | 3303   | VLR <b>I</b> INEPTAA <b>A</b> IAY |
|                    | HspA8        | <i>Mus musculus</i>               | 15481  | VLR <b>I</b> INEPTAA <b>A</b> IAY |
|                    | (Hsc70)      | <i>Homo sapiens</i>               | 3312   | VLR <b>I</b> INEPTAA <b>A</b> IAY |

Human and mouse peptides of the same protein were completely identical. Altered residues compared with *Mycobacterium tuberculosis* are in bold and underlined. ID, GeneID in the National Center for Biotechnology Information (NCBI) Entrez Gene database ([www.ncbi.nlm.nih.gov/entrez/query.fcgi?db=gene](http://www.ncbi.nlm.nih.gov/entrez/query.fcgi?db=gene)).

<sup>†</sup>mB29a and mB29b are mammalian homologs of mycobacterial Hsp70 peptide B29.

**Table S3. Hsp70 is a major contributor to the MHC class II ligandome**

| Sequence                                                | Class II type                | MHC origin | Protein source (100% ID) | Entrez gene ID | Ref. |
|---------------------------------------------------------|------------------------------|------------|--------------------------|----------------|------|
| QQYLPLPTPKVIGID                                         | HLA-DR10 (DRB1*1001)         | Human      | HSPA13 (23–37)           | 6782           | 1    |
| IIANDQGNRTTPSY                                          | I-Ak                         | Mouse      | HSPA8 (28–41)            | 15481          | 2    |
|                                                         |                              |            | HSPA2 (29–42)            | 15512          |      |
|                                                         |                              |            | HSPA1L (30–43)           | 15482          |      |
|                                                         |                              |            | HSPA1A (28–41)           | 193740         |      |
|                                                         |                              |            | HSPA1B (28–41)           | 15511          |      |
| ITPSYVAFTPEGERL                                         | I-Ab                         | Mouse      | HSPA5 (62–76)            | 14828          | 3    |
| TPSYVAFTDTERLIG (DA)                                    | HLA-DR7                      | Human      | HSPA8 (38–52)            | 3312           | 4    |
|                                                         |                              |            | HSPA2 (39–53)            | 3306           |      |
|                                                         |                              |            | HSPA1L (40–54)           | 3305           |      |
|                                                         |                              |            | HSPA1A (38–52)           | 3303           |      |
| TPSYVAFTDTERLIGD                                        | HLA-DQ2                      | Human      | As above                 | As above       | 5    |
| DVYVGYESVELADSNPQ                                       | HLA-DQ2                      | Human      | HSPA13 (77–93)           | 6782           | 5    |
| DAAKNQLTSNPEN                                           | I-Ag7                        | Mouse      | HSPA5 (79–91)            | 14828          | 6    |
| NPTNTVFDKRLIGRRFD                                       | HLA-DRB1*1104                | Human      | HSPA8 (62–79)            | 3312           | 7    |
| QDIKFLPFKVVKKTKPY                                       | BoLA-DRB3*1201 (in mus line) | Bovine     | HSPA5 (111–128)          | 14828          | 8    |
| <b>LNVLRIINEPTAAAIAYG</b><br><b>(NVLRIINEPTAAAIAYG)</b> | HLA-DRB1*0401 (in rat line)  | Human      | HSPA8 (167–184)          | 24468          | 9    |
|                                                         |                              |            | HSPA1A (167–184)         | 24472          |      |
|                                                         |                              |            | HSPA1L (169–186)         | 24963          |      |
|                                                         |                              |            | HSPA2 (168–185)          | 60460          |      |
| <b>NVLRIINEPTAAAIAYG</b>                                | HLA-DRB1*0401/DRB4*0101      | Human      | HSPA8 (168–184)          | 3312           | 10   |
|                                                         |                              |            | HSPA1A (168–184)         | 3303           |      |
|                                                         |                              |            | HSPA1L (170–186)         | 3305           |      |
|                                                         |                              |            | HSPA2 (169–185)          | 3306           |      |
|                                                         |                              |            | HSPA6 (170–186)          | 3310           |      |
| <b>NVLRIINEPTAAAIAYG</b>                                | DRB1*0401/*02x/DRB5*0101     | Human      | HSPA8 (168–184)          | 3312           | 11   |
|                                                         |                              |            | HSPA1A (168–184)         | 3303           |      |
|                                                         |                              |            | HSPA1L (170–186)         | 3305           |      |
|                                                         |                              |            | HSPA2 (169–185)          | 3306           |      |
|                                                         |                              |            | HSPA6 (170–186)          | 3310           |      |
| <b>NVMRIINEPTAAAIAYG</b>                                | DRB1*0401/*02x/DRB5*0101     | Human      | HSPA5 (194–210)          | 3309           | 11   |
| <b>VMRIINEPTAAAIAYG</b>                                 | HLA-DRB1*0401/DRB4*0101      | Human      | HSPA5 (195–210)          | 3309           | 10   |
| <b>IINEPTAAAIAYGLD</b>                                  | HLA-DQ6 (B*602)              | Human      | HSPA8 (172–186)          | 3312           | 12   |
|                                                         |                              |            | HSPA2 (173–187)          | 3306           |      |
|                                                         |                              |            | HSPA1L (174–188)         | 3305           |      |
|                                                         |                              |            | HSPA1A (172–186)         | 3303           |      |
|                                                         |                              |            | HSPA5 (198–212)          | 3309           |      |
| FDVSILTIEDGIFE                                          | HLA-DQ2                      | Human      | HSPA8 (205–218)          | 3312           | 5    |
| NRMVNHFAEFKRK                                           | I-Ek                         | Mouse      | HSPA8 (236–249)          | 15481          | 13   |
| RMVNHFAEFKRKH                                           | I-Ek                         | Mouse      | HSPA8 (236–249)          | 15481          | 14   |
| VNHFAEFKRKHKKD                                          | HLA-DR11/w52                 | Human      | HSPA8 (238–252)          | 3312           | 15   |
| XDFYTSITRAXFEE                                          | HLA-DR11/w52                 | Human      | HSPA8 (291–304)          | 3312           | 15   |
|                                                         |                              |            | HSPA1A (291–304)         | 3303           |      |
|                                                         |                              |            | HSPA1L (293–306)         | 3305           |      |
|                                                         |                              |            | HSPA2 (294–307)          | 3306           |      |
|                                                         |                              |            | HSPA6 (294–306)          | 3310           |      |
| EGEDFSETLTRAKFEEL                                       | BoLA-DRB3*1201(in mus line)  | Bovine     | HSPA5 (315–331)          | 14828          | 8    |
| ADLFRGTLDPVEK                                           | HLA-DQ6 (B*0604)             | Human      | HSPA8 (307–319)          | 3312           | 12   |
| KSINPDEAVAYG                                            | HLA-DQ2                      | Human      | HSPA8 (361–372)          | 3312           | 5    |
|                                                         |                              |            | HSPA1A (361–372)         | 3303           |      |
|                                                         |                              |            | HSPA1L (363–374)         | 3305           |      |
|                                                         |                              |            | HSPA2 (364–375)          | 3306           |      |
|                                                         |                              |            | HSPA6 (363–374)          | 3310           |      |
|                                                         |                              |            | HSPA8 (361–372)          | 3312           |      |
| TIPTKQTQFTTYSNDQP                                       | RT1.BI                       | Rat        | HSPA8 (419–436)          | 24468          | 16   |
|                                                         |                              |            | HSPA1A (419–436)         | 24472          |      |
| VPTKKSQIFSTASDNQPTVT                                    | HLA-DRB1*0401/DRB4*0101      | Human      | HSPA5 (443–462)          | 3309           | 10   |
| GERAMTKDNNLLG                                           | HLA-DR4Dw4                   | Human      | HSPA8 (445–457)          | 3312           | 17   |
|                                                         |                              |            | HSPA1A (445–457)         | 3303           |      |
|                                                         |                              |            | HSPA1L (447–459)         | 3305           |      |
|                                                         |                              |            | HSPA2 (448–460)          | 3306           |      |
|                                                         |                              |            | HSPA6 (447–459)          | 3310           |      |

**Table S3. Cont.**

| Sequence            | Class II type               | MHC origin | Protein source (100% ID)            | Entrez gene ID | Ref. |
|---------------------|-----------------------------|------------|-------------------------------------|----------------|------|
| GERAMTKDNNLLGKFE    | HLA-DRB1*0401/DRB4*0101     | Human      | HSPA8 (445–460)<br>HSPA1A (445–460) | 3312<br>3303   | 10   |
| GERAMTKDNNLLGRFE    | HLA-DRB1*0401/DRB4*0101     | Human      | HSPA6 (447–462)                     | 3310           | 10   |
| ANGILNVSAVDKSTGKE   | HLA-DRB*0401                | Human      | HSPA8 (482–499)                     | 3312           | 18   |
| GILNVSAVDKSTGK      | HLA-DRB*0401                | Human      | HSPA8 (484–497)                     | 3312           | 18   |
| GILNVSAVDKSTGKE     | HLA-DRB1*0401/DRB4*0101     | Human      | HSPA8 (484–498)                     | 3312           | 10   |
| CNEIINWLDKNQ        | HLA-DR4Dw10                 | Human      | HSPA8 (574–585)                     | 3312           | 17   |
| ISWLDKNQTAEKEEFE    | HLA-DQ8 (transgenic in NOD) | Human      | HSPA8 (578–593)                     | 15481          | 6    |
| YSGGGPPTGEEDTSEKDEL | I-Ag7                       | Mouse      | HSPA5 (636–655)                     | 14828          | 6    |

The Hsp70 nomenclature is as proposed by Kampinga et al. (19). Published data of Hsp70 sequences found in MHC class II are shown. The sequence of B29 and its endogenous homologs were frequently eluted from different MHC class II molecules. Peptides are listed according to sequence number. Bold indicates peptides homologous to B29. In the boxed section B29 homolog peptides eluted from RA associated HLA-DRB1\*0401.

- Alvarez I, et al. (2008) The rheumatoid arthritis-associated allele HLA-DR10 (DRB1\*1001) shares part of its repertoire with HLA-DR1 (DRB1\*0101) and HLA-DR4 (DRB\*0401). *Arthritis Rheum* 58:1630–1639.
- Nelson CA, Roof RV, McCourt DW, Unanue ER (1992) Identification of the naturally processed form of hen egg white lysozyme bound to the murine major histocompatibility complex class II molecule I-Ak. *Proc Natl Acad Sci USA* 89:7380–7383.
- Dongre AR, et al. (2001) In vivo MHC class II presentation of cytosolic proteins revealed by rapid automated tandem mass spectrometry and functional analyses. *Eur J Immunol* 31:1485–1494.
- Chicz RM, et al. (1993) Specificity and promiscuity among naturally processed peptides bound to HLA-DR alleles. *J Exp Med* 178:27–47.
- Stepniak D, et al. (2008) Large-scale characterization of natural ligands explains the unique gluten-binding properties of HLA-DQ2. *J Immunol* 180:3268–3278.
- Suri A, Walters JJ, Gross ML, Unanue ER (2005) Natural peptides selected by diabetogenic DQ8 and murine I-A(g7) molecules show common sequence specificity. *J Clin Invest* 115:2268–2276.
- Verreck FA, et al. (1996) Natural peptides isolated from Gly86/Val86-containing variants of HLA-DR1, -DR11, -DR13, and -DR52. *Immunogenetics* 43:392–397.
- Sharif S, Mallard BA, Wilkie BN (2003) Characterization of naturally processed and presented peptides associated with bovine major histocompatibility complex (BoLA) class II DR molecules. *Anim Genet* 34:116–123.
- Muntasell A, et al. (2004) Dissection of the HLA-DR4 peptide repertoire in endocrine epithelial cells: Strong influence of invariant chain and HLA-DM expression on the nature of ligands. *J Immunol* 173:1085–1093.
- Dengjel J, et al. (2005) Autophagy promotes MHC class II presentation of peptides from intracellular source proteins. *Proc Natl Acad Sci USA* 102:7922–7927.
- Halder T, et al. (1997) Isolation of novel HLA-DR restricted potential tumor-associated antigens from the melanoma cell line FM3. *Cancer Res* 57:3238–3244.
- Sanjeevi CB, Lybrand TP, Stevanovic S, Rammensee HG (2002) Molecular modeling of eluted peptides from DQ6 molecules (DQB1\*0602 and DQB1\*0604) negatively and positively associated with type 1 diabetes. *Ann N Y Acad Sci* 958:317–320.
- Marrack P, Ignatowicz L, Kappler JW, Boymel J, Freed JH (1993) Comparison of peptides bound to spleen and thymus class II. *J Exp Med* 178:2173–2183.
- Freed JH, Marrs A, VanderWall J, Cohen PL, Eisenberg RA (2000) MHC class II-bound self peptides from autoimmune MRL/lpr mice reveal potential T cell epitopes for autoantibody production in murine systemic lupus erythematosus. *J Immunol* 164:4697–4705.
- Newcomb JR, Cresswell P (1993) Characterization of endogenous peptides bound to purified HLA-DR molecules and their absence from invariant chain-associated alpha beta dimers. *J Immunol* 150:499–507.
- Reizis B, et al. (1996) The peptide binding specificity of the MHC class II I-A molecule of the Lewis rat, RT1.B1. *Int Immunol* 8:1825–1832.
- Friede T, et al. (1996) Natural ligand motifs of closely related HLA-DR4 molecules predict features of rheumatoid arthritis associated peptides. *Biochim Biophys Acta* 1316:85–101.
- Lippolis JD, et al. (2002) Analysis of MHC class II antigen processing by quantitation of peptides that constitute nested sets. *J Immunol* 169:5089–5097.
- Kampinga HH, et al. (2009) Guidelines for the nomenclature of the human heat shock proteins. *Cell Stress Chaperones* 14:105–111.

**Table S4. MHC class II presented Hsp70 peptides eluted from in vitro cultured murine bone marrow-derived DCs**

| Sequence      | Relative abundance, % |
|---------------|-----------------------|
| VLRVIN        | 4                     |
| VLRVINE       | 4                     |
| VLRVINEP      | 13                    |
| VLRVINEPT     | 1                     |
| VLRVINEPTA    | 2                     |
| VLRVINEPTAA   | 9                     |
| VLRVINEPTAAA  | 6                     |
| VLRVINEPTAAAL | 55                    |
| LRVINEPTAAAL  | 5                     |
| <b>Total</b>  | <b>100</b>            |

Peptide–MHC complexes were isolated from BM-derived DCs. Subsequently, eluted peptides were analyzed by data-dependent nanoscale LC/MS. Several homologs of the mB29a peptide varying in length are depicted, and their relative abundance compared with all eluted mB29a variants is shown.
